# Supplementary material for: Fabrication of chitosan/gelatin foams with ordered porous structures for use in drug release and metal ion adsorption
Source: Royal Society of Chemistry journal article supplement (doi:10.1039/c4ra04212c), 2014-07-22
Supplement: c4ra04212c1.pdf [file c4ra04212c1.pdf]

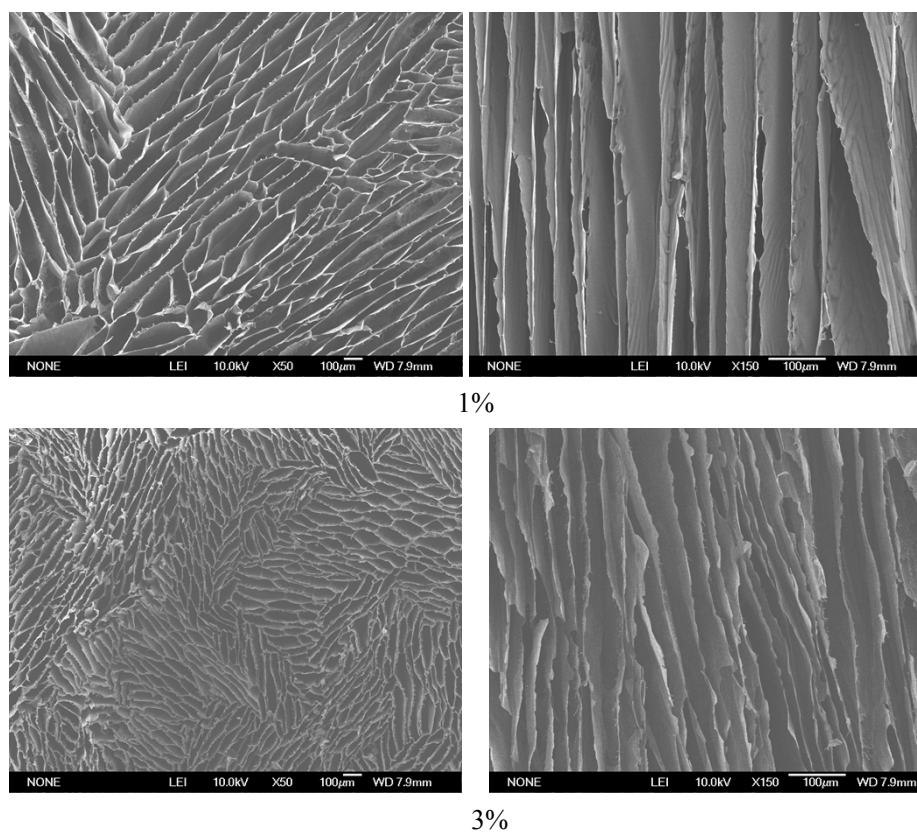

Fig. S1. SEM photos of cross sections (left) and vertical sections (right) of Gel foams with different Gel concentrations (1%, 3%)
